# Supplementary material for: A Discriminative Approach for Unsupervised Clustering of DNA Sequence Motifs
Source: PubMed Central journal article supplement (PMC3605052; doi:10.1371/journal.pcbi.1002958), 2013-03-21

**A-D.** DNA-binding phylogenies for HMG, MADS, SMAD and STAT classes. Phylogenies were compiled as described in Material and Methods. Colors highlight protein subgroups corresponding to motif clusters.

**E.** Clustering of Transfac motifs calculated with m2match

**A. HMG class**

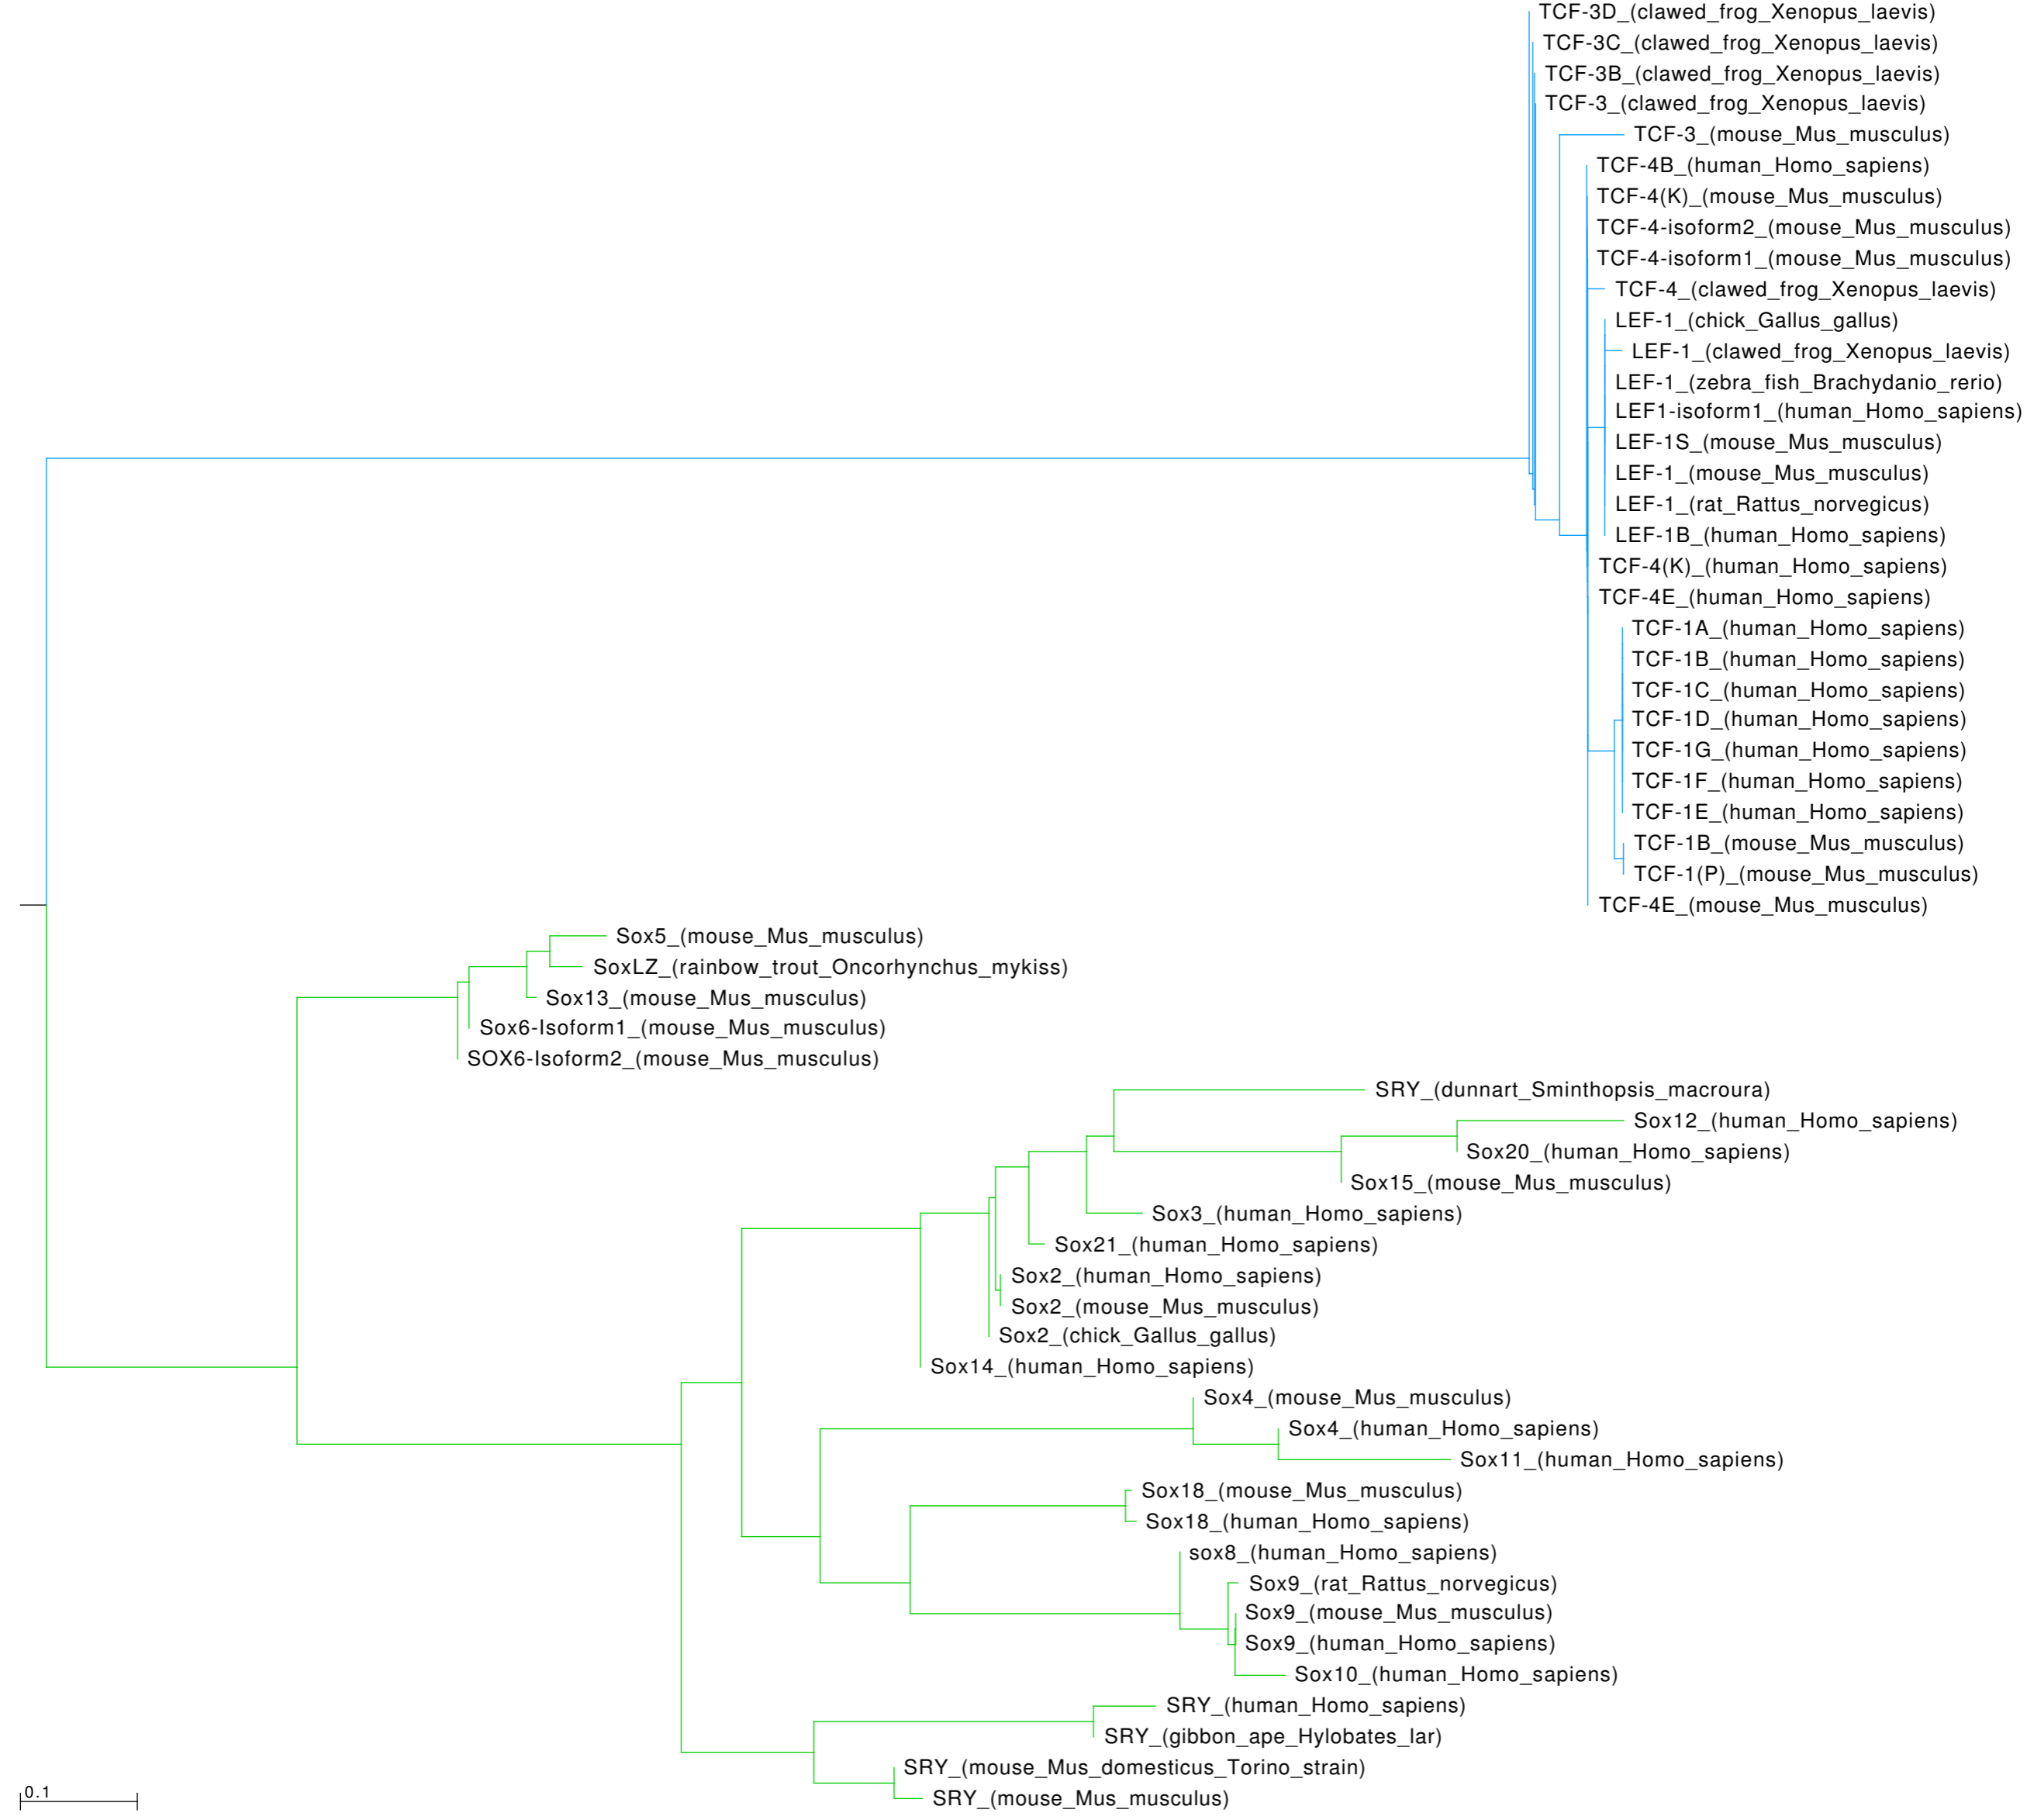

**B. MADS class**

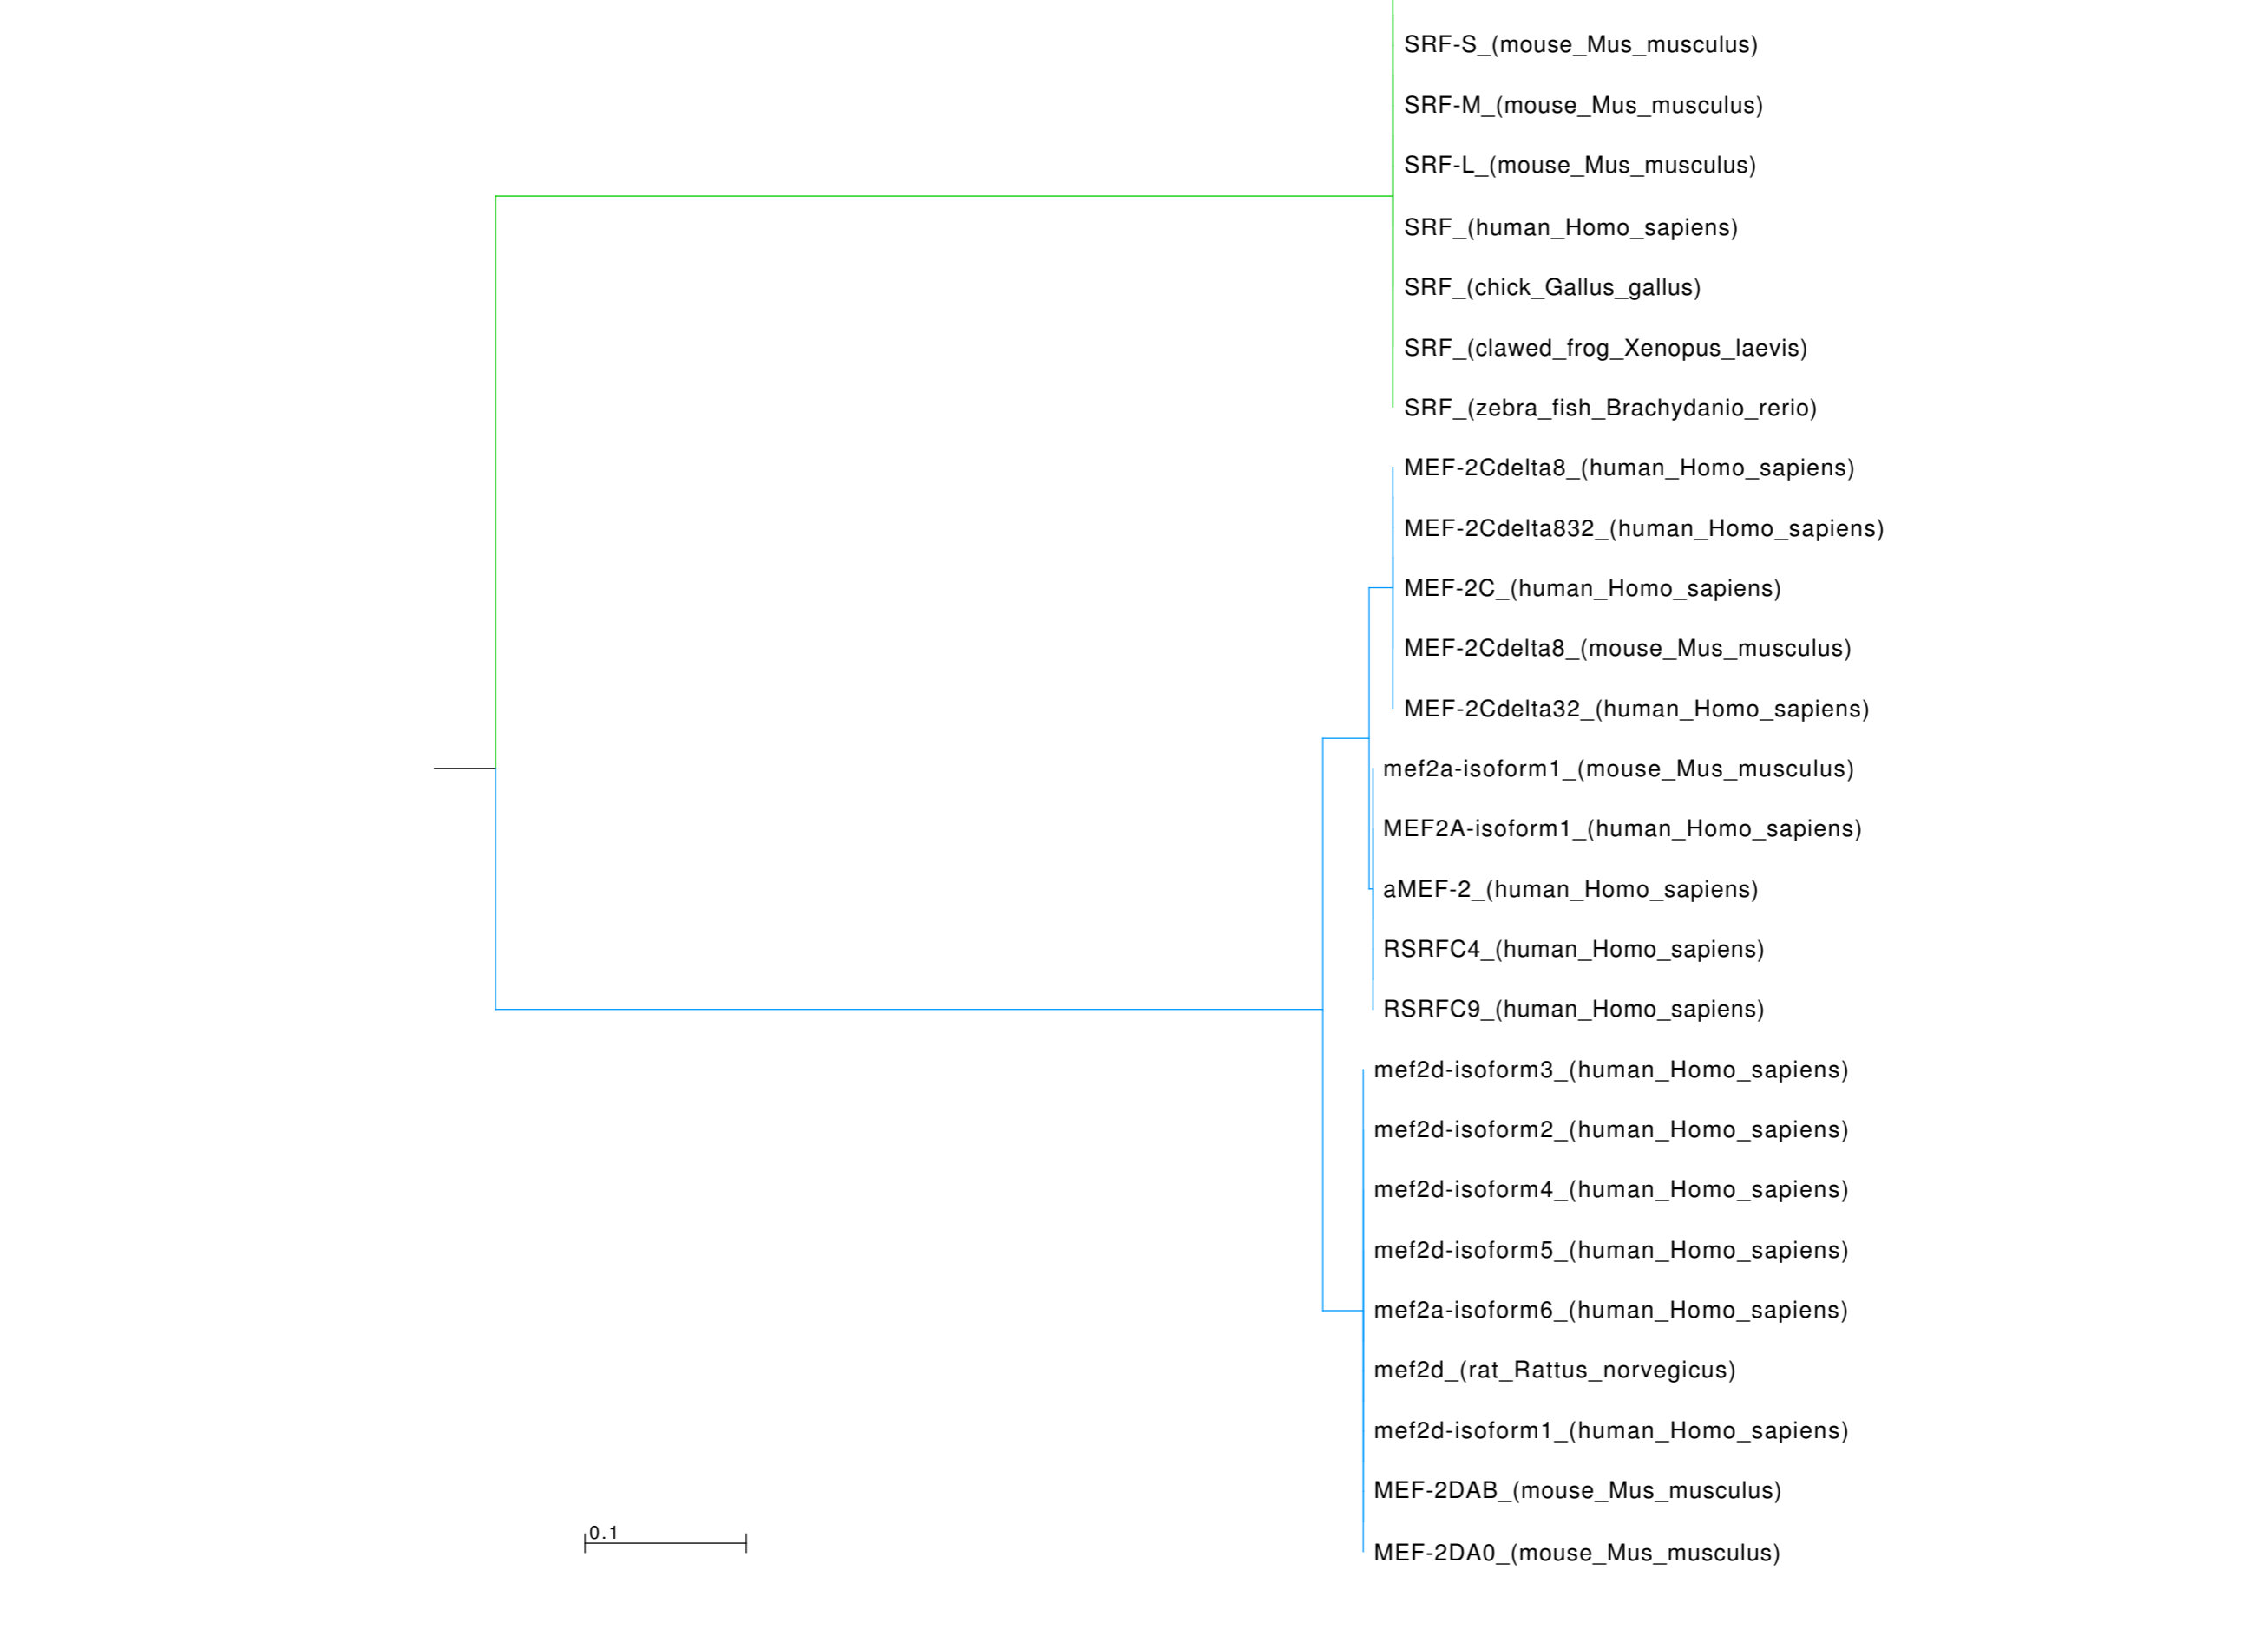

**C. SMAD class**

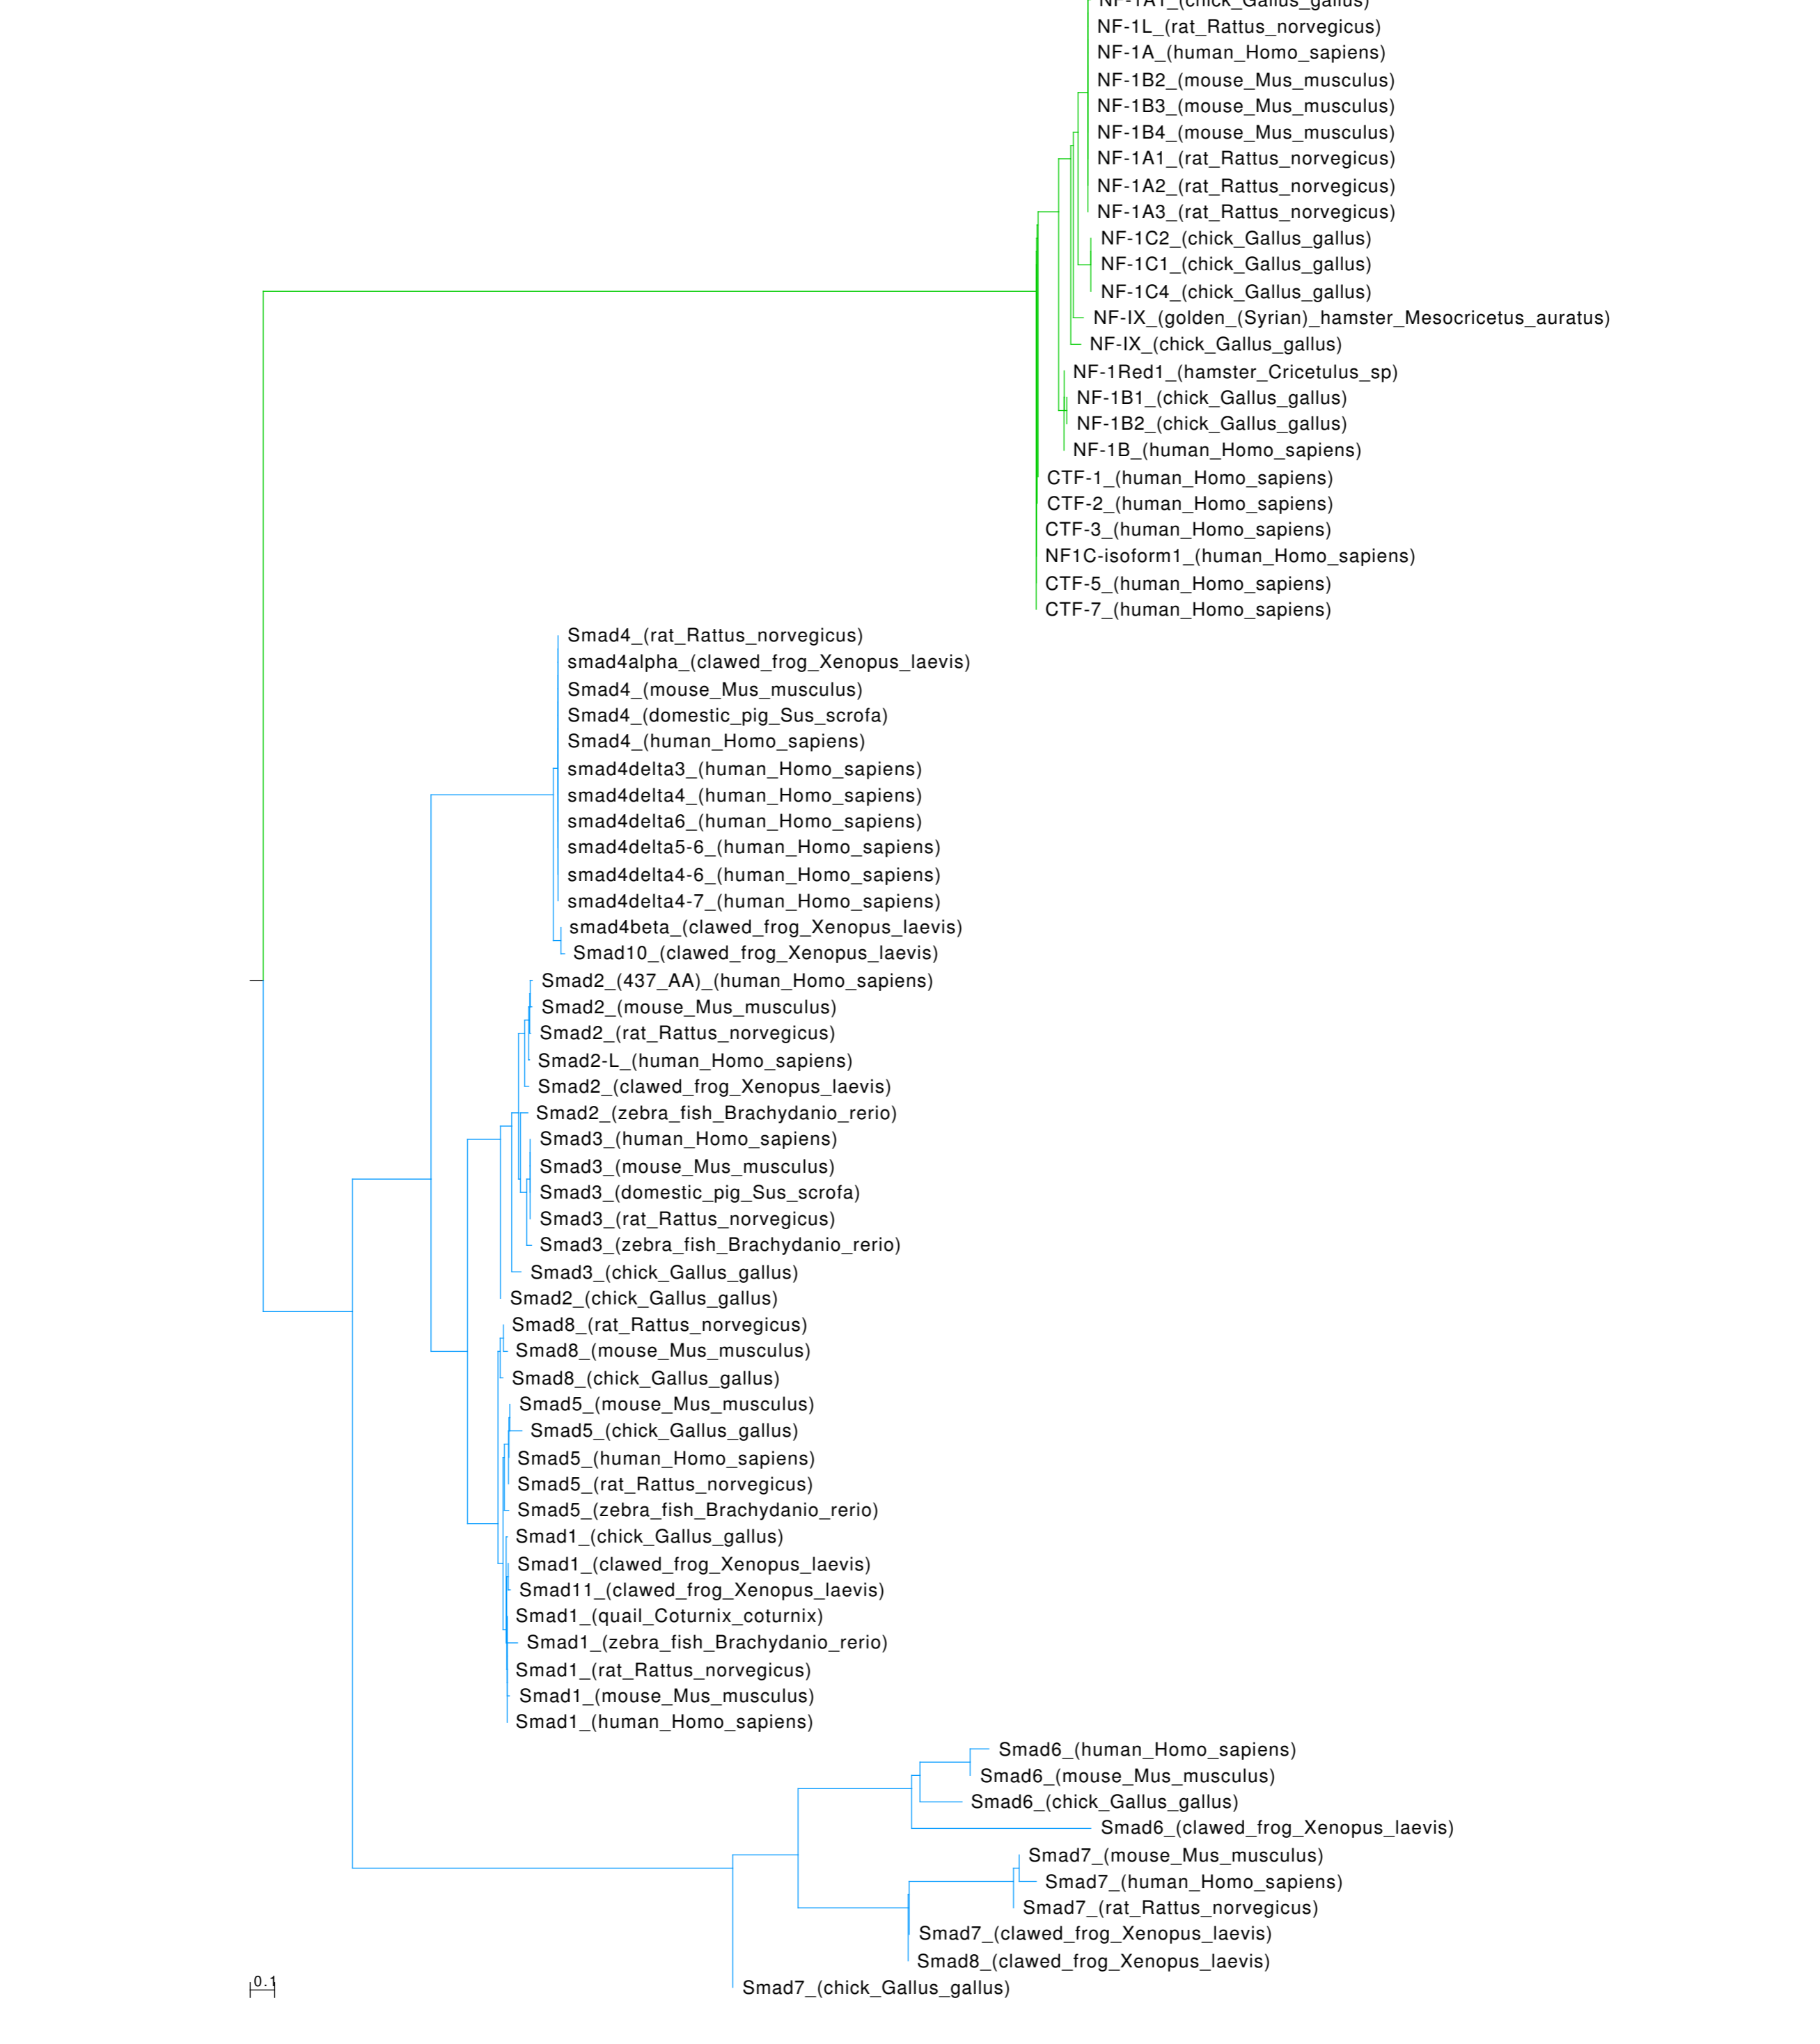

**D. STAT class**

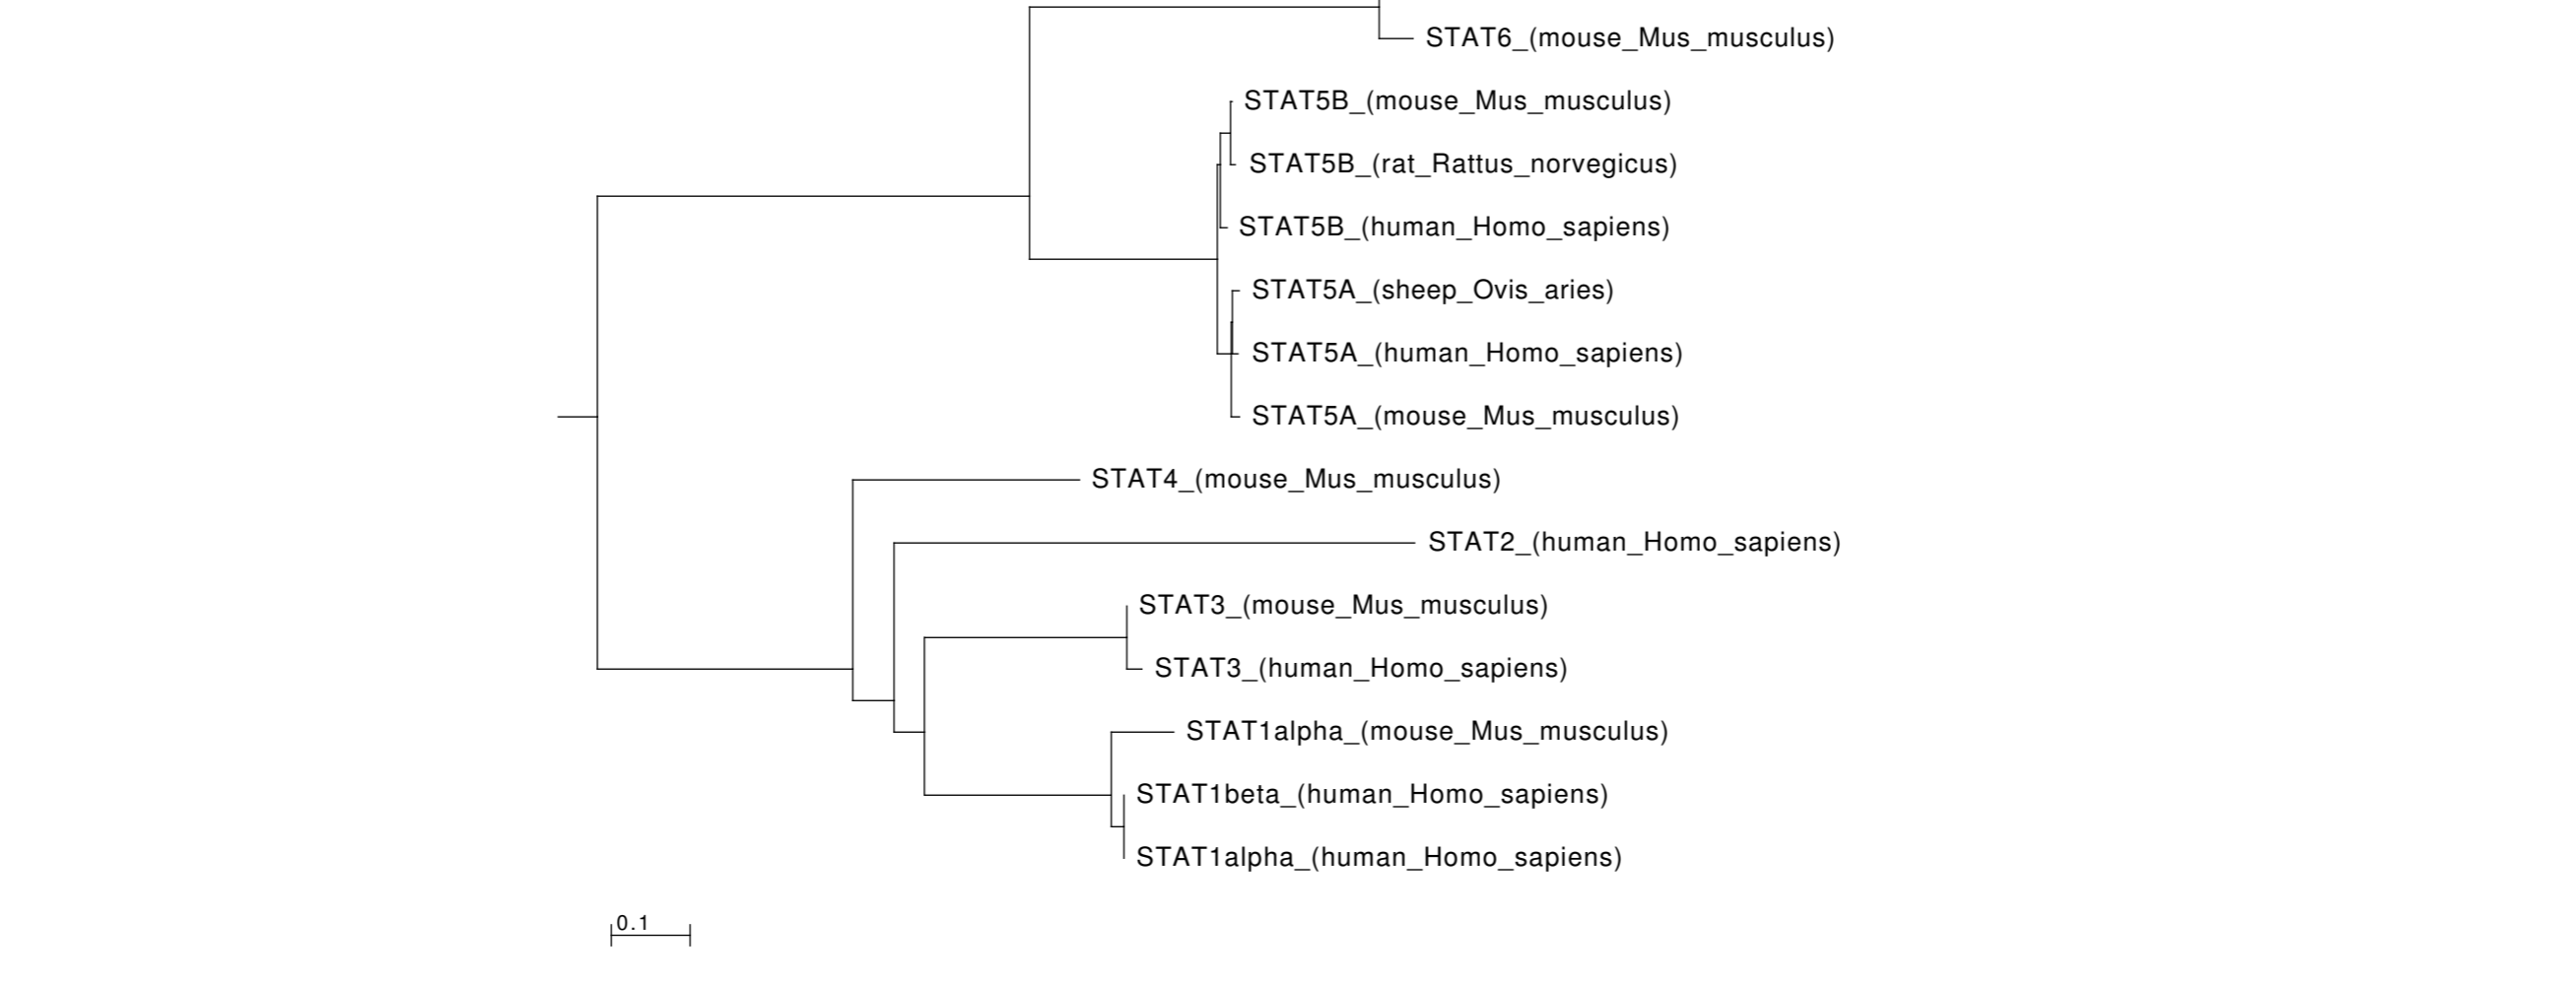

**E. m2match clustering of Transfac STAT motifs**

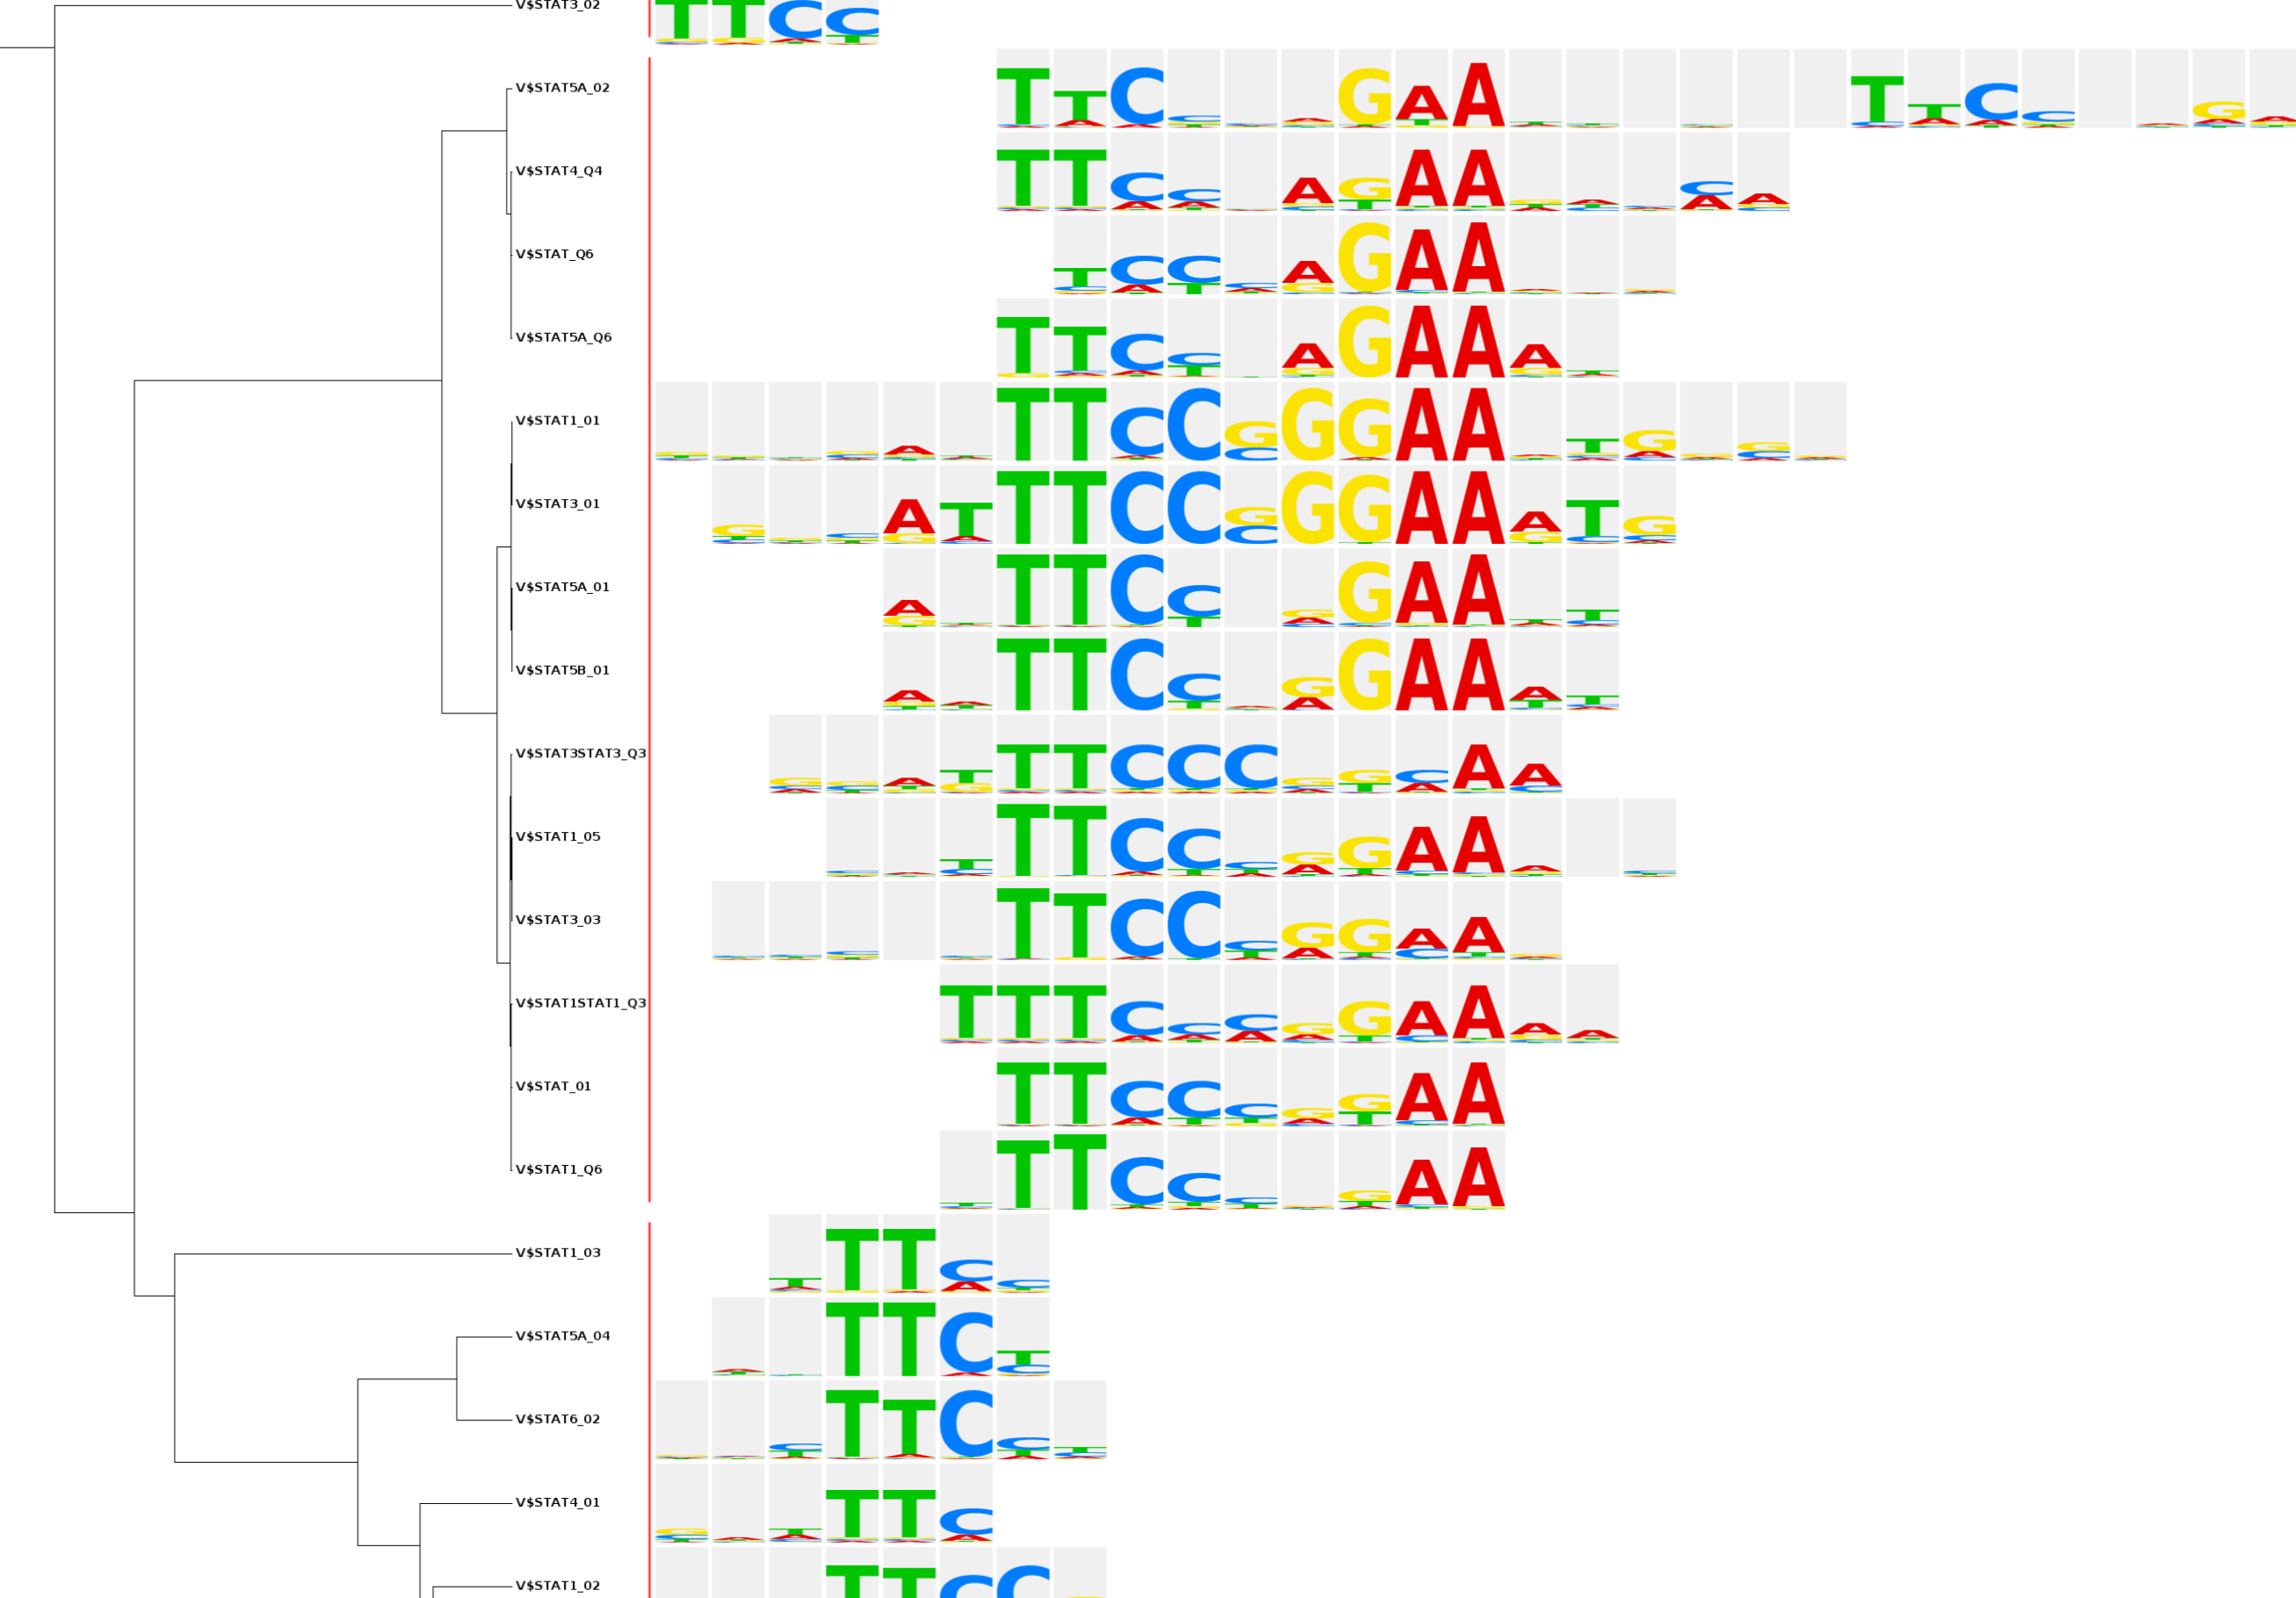

Supplement: pcbi.1002958.s002.pdf [file pcbi.1002958.s002.pdf]
