# Supplementary material for: A Discriminative Approach for Unsupervised Clustering of DNA Sequence Motifs
Source: PLoS Comput Biol. 2013 Mar 21;9(3):e1002958. doi: 10.1371/journal.pcbi.1002958 (PMC3605052; doi:10.1371/journal.pcbi.1002958)
Supplement: Table S4 — Motif families extracted according to motif networks and MCL clusters. (XLS) [file pcbi.1002958.s009.xls]

## Sheet: Sheet1
Motif families extracted according to motif networks and MCL clusters. Class names are given in blue title lines above motif families compiled for respective classes. Differences to the original MCL cluster are described in the third column.
Family no.	BHLH	#PWMs	Difference to MCL cluster
1	MAX_Q6,USF_01,HIF1_Q5,CLOCKBMAL_Q6,MAX_01,USF_Q6_01,EBOX_Q6_01,HES1_Q6,ARNT_01,NMYC_01,CMYC_02,USF_Q6,USF_C,STRA13_01,TFEB_01,ARNT_02,MYCMAX_01,HES1_Q2,HIF1_Q3,DEC2_Q2,TFE_Q6,MYCMAX_03,AHRARNT_02,HIF2A_01,MYCMAX_02,MYC_Q2,HIF1A_Q6,AHRHIF_Q6,SREBP1_01,AHR_01,AHR_Q5,USF_02,MYCMAX_B,AHRARNT_01,USF2_Q6,CMYC_01,DEC_Q1	37
2	MYOD_Q6_01,E12_Q6,MYOD_Q6,AP4_Q6_01,E2A_Q2,MYOD_01,TAL1_Q6,LMO2COM_01,NEUROD_01,AP4_Q5,MATH1_Q2,AP4_Q6,E2A_Q6,HTF4_Q2,MYOGENIN_Q6,HEB_Q6,AP4_01,MYF_01,E47_01,NEUROD_02,TAL1BETAE47_01,E47_02,TAL1BETAITF2_01,TAL1ALPHAE47_01,HEN1_01,HEN1_02,AP4_Q6_02	27	Omitted NMYC_02
3	SREBP_Q3,SREBP1_02,SREBP2_Q6,SREBP1_Q5,SREBP1_Q6,SREBP_Q6	6
BHSH
4	AP2_Q3,AP2ALPHA_01,AP2ALPHA_03,AP2BETA_Q3,AP2ALPHA_02,AP2_Q6,AP2_Q6_01,AP2GAMMA_01,AP2GAMMA_Q5,AP2ALPHA_Q6	10
BZIP
5	AP1FJ_Q2,MAF_Q6_01,AP1_Q2,NFE2_01,ZTA_Q2,BACH1_01,NRF2_Q4,AP1_Q6_01,TCF11MAFG_01,AP1_C,MAFA_Q4_01,CMAF_01,BACH2_01,AP1_01,MAFK_Q3,TCF11_01,AP1_Q4_01,AP1_Q2_01,AP1_Q4,MAFB_01,FRA1_Q5,CMAF_02,LMAF_Q2,AP1_Q6,VMAF_01,TAXCREB_02	26	Omitted CEBP_01 and DBP_Q6
6	CREM_Q6,ATF6_01,HTF_01,ATF1_Q6,CREB_Q4_01,XBP1_02,CREB_Q2_01,CREBP1CJUN_01,CREBP1_01,ATF3_Q6_01,ATF_01,CREB_Q3,CREBP1_Q2,ATF4_Q6,ATF4_Q2,CREB_02,ATF2_Q5,CREB_01,CREBATF_Q6,TAXCREB_01,ATF1_Q6_01,CREB_Q2,XBP1_01,ATF_B,ATF3_Q6,CREB_Q4	26	Omitted VJUN_01
7	CEBPG_Q6_01,CEBP_C,CEBP_Q3,CEBPA_Q6,VBP_01,CEBP_Q2,HLF_01,CEBPB_02,CEBPD_Q6,E4BP4_01,CEBPB_01,CEBPA_01,CEBPE_01,CEBPE_Q6,CEBP_Q2_01,DBP_Q6_01,CEBPB_Q6,CHOP_01,TEF_Q6	19
DM
8	DMRT7_01,DMRT3_01,DMRT5_01,DMRT4_01,DMRT2_01,DMRT1_01	6
E2F
9	E2F_Q6_01,E2F1_Q4,E2F1_Q6,E2F_Q4_01,E2F_Q4,E2F1_Q4_01,E2F_Q3_01,E2F1_Q3_01,E2F4DP1_01,E2F1DP1RB_01,E2F1DP2_01,E2F_01,E2F1_Q3,E2F4DP2_01,E2F_Q6,E2F_Q3,E2F_Q2,E2F_03,E2F_02,E2F1DP1_01,E2F1_Q6_01	21
ETS
10	ELK1_05,ELF5_02,SPI1_Q5,ETS1_B,SPIB_02,FLI1_01,ELK1_02,GABPA_Q4,GADP_01,SAP1A_02,ELF1_Q6,cETS2_01,ELF5_01,ETS2_Q6,ETS_Q4,NET_01,ESE1_Q3,NERF_Q2,ELK1_03,CETS1_01,PEA3_01,PEA3_Q6,CETS168_Q6,GABPA_01,EHF_02,ERF_01,ERG_02,GABP_B,ER81_01,SPIC_01,ETV3_01,ELK1_01,ELF2_01,GABPBETA_Q3,SAP1A_01,FLI1_Q6,CETS1P54_01,SPI1_01,NRF2_01,CETS1P54_03,ETS2_B,ERM_01,PET1_01,ELF4_01,ER71_01,ELF1_01,CETS1_Q6,CETS1P54_0…	60
FORKHEAD
11	FREAC4_01,HNF3B_01,FOX_Q2,XFD1_01,FOXO1_Q5,HFH1_01,HNF3G_Q4,HNF3A_01,HFH3_01,FREAC7_01,FOXO1_02,FREAC2_01,FREAC3_01,HFH4_01,HFH8_01,HNF3B_Q6,FOXO3A_Q1,FOXO4_02,XFD2_01,HNF3ALPHA_Q6,FOXO1_03,FOXO3_01,XFD3_01,HNF3_Q6_01,FOXJ2_01,HNF3_Q6,FOXO1_01,FOXO1_04,FOXP3_01,FOXD3_01,FOXO4_01,FOXP1_01	32
GENINI
12	MUSCLE_INI_B,MINI20_B,MINI19_B	3
13	GEN_INI2_B,GEN_INI_B,GEN_INI3_B	3
HISTONE
14	NFY_Q6,ACAAT_B,CAAT_C,NFY_Q6_01,ALPHACP1_01,NFY_C,NFY_01,CAAT_01	8
HMG
15	LEF1TCF1_Q4,LEF1_Q2_01,TCF4_Q5_01,TCF4_01,LEF1_Q5,TCF3_01,TCF4_Q5,LEF1_Q2	8	Omitted SOX_01 and SOX9_Q4
16	SOX_Q6,SOX5_01,SOX17_01,SOX4_01,SRY_02,SOX9_B1,SOX2_Q6,SOX10_Q6	8
HOX
17	OCT1_07,POU3F2_01,OCT1_06,BRN2_01,OCT_Q6,OCT1_04,OCT1_02,OCT2_02,OCT2_01,OCT_C,OCT1_Q6,POU5F1_01,POU2F3_01,OCTAMER_01,OCT1_05,POU3F2_02,OCT1_01,OCT4_01,OCT1_Q5_01,POU1F1_Q6,OCT1_B,OCT4_02	22	Omitted ALX4_01, NANOG_02 and XVENT1_01
18	NKX23_01,NKX32_01,NKX22_01,NKX32_02,NKX3A_02,NKX29_01,NKX3A_01,NKX22_02,NKX25_Q5,NKX26_01,NKX24_01,NKX25_03,NKX25_01,NKX21_01	14	Omitted TTF1_Q6, HMX1_01, TTF1_Q5 and TITF1_Q3
19	PAX6_01,PAX5_02,PAX1_B,PAX9_B,PAX2_01,PAX8_B,PAX4_04,PAX3_B,PAX5_01,PAX4_01,PAX8_01,PAX3_01	12
20	IRX5_01,IRX3_02,IRX4_01,IRX2_01,IRX3_01,IRXB3_01	6
HSF
21	HSF1_Q6,HSF_Q6,HSF2_01,HSF1_01,HSF2_02	5
IRF
22	IRF1_Q6,ISRE_01,IRF1_01,ICSBP_Q6,IRF_Q6_01,IRF2_01,IRF_Q6,IRF7_01,IRF1_Q6_01,IRF7_Q3,IRF3_Q3	11
MADS
23	AMEF2_Q6,MEF2_01,MEF2_03,MEF2C_Q4,HMEF2_Q6,MMEF2_Q6,MEF2_02,MEF2A_Q6,MEF2D_Q4,MEF2A_05,RSRFC4_01,RSRFC4_Q2,MEF2_04,MEF2_Q6_01	14
24	SRF_01,SRF_Q4,SRF_03,SRF_Q5_01,SRF_Q5_02,SRF_02,SRF_Q6,SRF_C	8
MYB
25	VMYB_02,MYB_Q6,VMYB_01,CMYB_Q5,MYB_Q3,CMYB_01,MYB_Q5_01	7
P53
26	P53_01,P53_04,P53_DECAMER_Q2,P53_05,P53_02,P63_01,P53_03	7
REL
27	NFKAPPAB50_01,RELBP52_01,P50P50_Q3,NFKB_Q6_01,P50RELAP65_Q5_01,NFKB_C,NFKAPPAB65_01,NFKB_Q6,CREL_01,NFKAPPAB_01	10
28	NFAT3_Q3,NFAT2_01,NFAT_Q4_01,NFAT2_Q5,NFAT4_Q3,NFAT_Q6,NFAT2_02,NFAT1_Q6	8
29	RBPJK_Q4,RBPJK_01	2
RFX
30	RFX1_02,RFX1_01,EFC_Q6,MIF1_01,RFX_Q6	5
RUNT
31	CBF_02,PEBP_Q6,CBF_01,COREBINDINGFACTOR_Q6,AML1_01,OSF2_Q6,AML2_01,AML_Q6,AML1_Q4,AML1_Q6	10
SMAD
32	SMAD3_Q6,SMAD_Q6_01,SMAD_Q6,SMAD4_Q6,SMAD3_Q6_01,SMAD4_Q6_01	6
33	CTF1_01,NF1_Q6_01,MYOGNF1_01,NF1_Q6	4
STAT
34	STAT5B_01,STAT1_Q6,STAT_Q6,STAT3_03,STAT1_01,STAT5A_02,STAT5A_01,STAT3STAT3_Q3,STAT4_Q4,STAT5A_Q6,STAT1_05,STAT3_01,STAT1STAT1_Q3,STAT_01	14
TBP
35	MTATA_B,TATA_01,TATA_C	3
36	TBP_Q6,TBP_01	2
TBX
37	BRACH_01,TBR2_01,TBX15_01,TBX15_02,TBX22_01,TBX5_01,TBX18_01,TBX5_Q5,TBX5_02	9
ZFC2H2
38	REX1_03,YY1_Q6,NFMUE1_Q6,YY1_Q6_02,REX1_01,YY2,YY1_Q6_03,REX1_02,YY1_01,YY1_02	10
39	EVI1_01,EVI1_06,EVI1_03,EVI1_02,EVI1_04,EVI1_05,EVI1_Q3	7
40	IK_Q5,HELIOSA_01,IK1_01,LYF1_01,IK2_01,IK3_01	6	Omitted RREB1_01
41	NRSF_Q4,REST_01,NRSF_01,NRSE_B	4
42	GFI1_Q6_01,GFI1_01,GFI1_Q6,GFI1B_01	4
43	ZF5_01,ZF5_B	2
44	CTCF_01,CTCF_02	2
45	DELTAEF1_01,AREB6_02,AREB6_01,AREB6_03	4
ZFC4-NR
46	AR_03,GR_Q6,GR_Q6_01,AR_Q2,AR_02,GRE_C,AR_04,AR_01,GR_01,PR_01,PR_02,PR_Q2,AR_Q6	13
ZFGATA
47	GATA_Q6,GATA2_03,GATA6_01,GATA2_01,GATA3_03,GATA1_02,GATA1_04,GATA5_Q4,GATA2_02,GATA1_05,GATA3_01,GATA1_06,GATA3_02,GATA_C,GATA1_01,LMO2COM_02,GATA4_Q3,GATA1_03	18
		549
